# Supplementary material
Source: publisher figshare collection journal article supplement (https://sage.figshare.com/ndownloader/files/13365662)

## **Appendix A. Subjects and Subtopics for Children and Family Bill Collection**

To collect information on children and family bills, the data was first collected by the broad subject area and then further reduced by the sub-categories within that subject. For example, in the area of Crime and Law Enforcements, we only collected information on bills that fit under the subcategory of crimes against children. All topics included within the subcategories are included in the analysis.

### **Gov Track Subjects:**

- Crime and Law Enforcement
  - Crimes against children
- Education
  - Preschool education
  - Elementary and secondary education
- Families
  - Adoption and foster care
  - Child care and development
  - Child safety and welfare
  - Domestic violence and child abuse
  - Family relationships
  - Family services
  - Separation, divorce, custody, support
- Health
  - Birth defects
  - Child health
- Labor and Employment
  - Employee benefits and pensions
  - Employee leave
  - Youth employment and child labor

## Appendix B: Additional Statistical Results

**Table B1: Count of Child & Family Centered Bills Sponsored**

|                          | Young Child                  | Adult Child                 | Outliers Removed            |
|--------------------------|------------------------------|-----------------------------|-----------------------------|
| No Children              | -0.29**<br>(0.10)            | -0.14<br>(0.10)             | ---                         |
| Young Child              | ---                          | 0.15 <sup>†</sup><br>(0.09) | 0.22*<br>(0.11)             |
| Adult Child              | -0.15 <sup>†</sup><br>(0.09) | ---                         | 0.12<br>(0.10)              |
| Seniority                | 0.04**<br>(0.02)             | 0.04**<br>(0.02)            | 0.05**<br>(0.02)            |
| DW Nominate              | -0.26*<br>(0.10)             | -0.26*<br>(0.10)            | -0.26*<br>(0.11)            |
| Substantive Bills        | 0.02***<br>(0.00)            | 0.02***<br>(0.00)           | 0.02***<br>(0.01)           |
| Commemorative<br>Bills   | 0.01<br>(0.01)               | 0.01<br>(0.01)              | 0.02<br>(0.01)              |
| Majority Party<br>Member | 0.04<br>(0.06)               | 0.04<br>(0.06)              | 0.10*<br>(0.05)             |
| 1993-2013                | 0.61***<br>(0.11)            | 0.61***<br>(0.11)           | 0.61***<br>(0.12)           |
| Women<br>Friendliness    | 0.97**<br>(0.37)             | 0.97**<br>(0.37)            | 0.85 <sup>†</sup><br>(0.50) |
| Constant                 | 0.63***<br>(0.12)            | 0.48***<br>(0.10)           | 0.35*<br>(0.16)             |
| Inalpha                  | -2.470***<br>(0.297)         | -2.470***<br>(0.297)        | -2.31***<br>(0.22)          |
| Pseudo R <sup>2</sup>    | 0.15                         | 0.15                        | 3432                        |
| Observations             | 3840                         | 3840                        |                             |

Standard errors in parentheses

<sup>†</sup>  $p < 0.10$ , \*  $p < 0.05$ , \*\*  $p < 0.01$ , \*\*\*  $p < 0.001$

**Table B2: Predicted Counts of Sponsored Children and Family Legislation**

|               | All C&F Bills | All C&F Bills- age<br>categories | Specific C&F Bills |
|---------------|---------------|----------------------------------|--------------------|
| None          | 6.98 bills    | 7.03 bills                       | 7.91 bills         |
| (Young) Child | 8.35 bills    | 9.37 bills                       | 11.52 bills        |
| Adult Child   |               | 8.09 bills                       | 8.86 bills         |
| Observations  | 3840          | 3840                             | 454                |

**Figure B1: Mean Number of Child and Family Bills Introduced by Session by Parental Group**

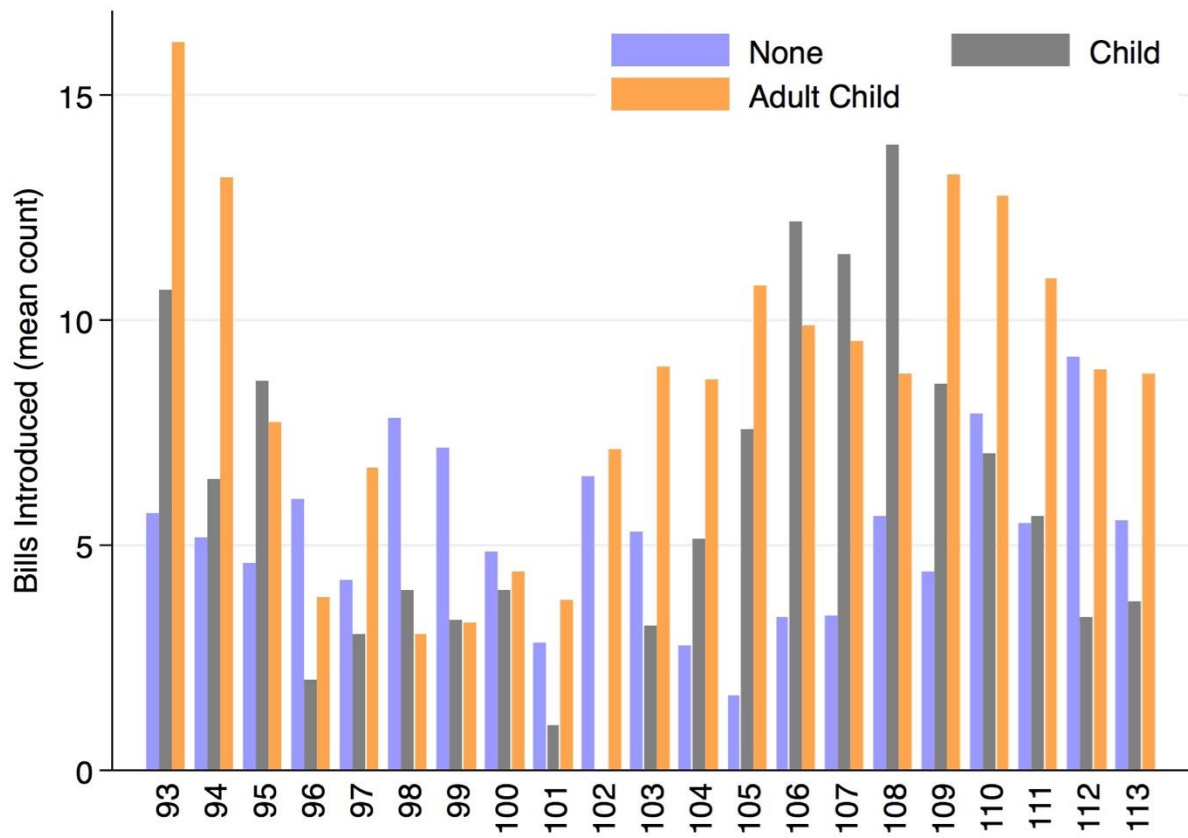

Supplement: Supplementary file 1 [file 13365662]
